# Supplementary material
Source: publisher figshare collection journal article supplement (https://karger.figshare.com/ndownloader/files/32892053)
Supplement: Supplementary file 1 [file 32892053]

**Appendix II PCA analysis**

| **Total Variance Explained** | | | | | | |
| --- | --- | --- | --- | --- | --- | --- |
| Component | Initial Eigenvalues | | | Extraction Sums of Squared Loadings | | |
| Total | % of Variance | Cumulative % | Total | % of Variance | Cumulative % |
| 1 | 3.614 | 51.627 | 51.627 | 3.614 | 51.627 | 51.627 |
| 2 | .911 | 13.008 | 64.634 |  |  |  |
| 3 | .636 | 9.092 | 73.727 |  |  |  |
| 4 | .548 | 7.824 | 81.551 |  |  |  |
| 5 | .502 | 7.178 | 88.729 |  |  |  |
| 6 | .410 | 5.851 | 94.580 |  |  |  |
| 7 | .379 | 5.420 | 100.000 |  |  |  |
| Extraction Method: Principal Component Analysis. | | | | | | |
